# Supplementary material for: One-step synthesis of Nb-doped TiO2 rod@Nb2O5 nanosheet core–shell heterostructures for stable high-performance lithium-ion batteries
Source: Royal Society of Chemistry journal article supplement (doi:10.1039/c5ra28065f), 2016-01-01
Supplement: c5ra28065f1.pdf [file c5ra28065f1.pdf]

## Supporting Information

Xiao Yu,<sup>a</sup> Ling Xin,<sup>a,c</sup> Yong Liu,<sup>\*c</sup> Wenxia Zhao,<sup>b</sup> Baojun Li,<sup>c</sup> Xiang Zhou<sup>c</sup> and Hui Shen<sup>a</sup>

<sup>a</sup>*Institute for Solar Energy Systems, School of Physics, Sun Yat-sen University, Guangzhou 510275, China.*

<sup>b</sup>*Instrumental Analysis & Research Center, Sun Yat-sen University, Guangzhou 510275, China.*

<sup>c</sup>*School of Materials Science and Engineering, State Key Laboratory of Optoelectronic Materials and Technologies, Sun Yat-sen University, Guangzhou 510275, China.*

*E-mail: liuyong7@mail.sysu.edu.cn*

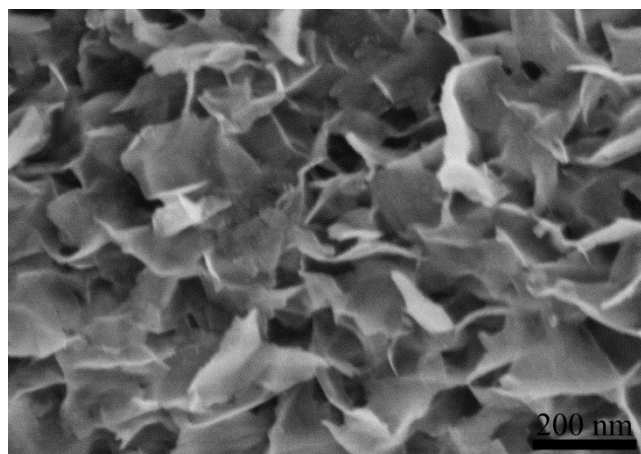

**Fig. S1** High-magnification FESEM images of Nb<sub>2</sub>O<sub>5</sub> nanosheets in the Nb-doped TiO<sub>2</sub>@Nb<sub>2</sub>O<sub>5</sub> sample.

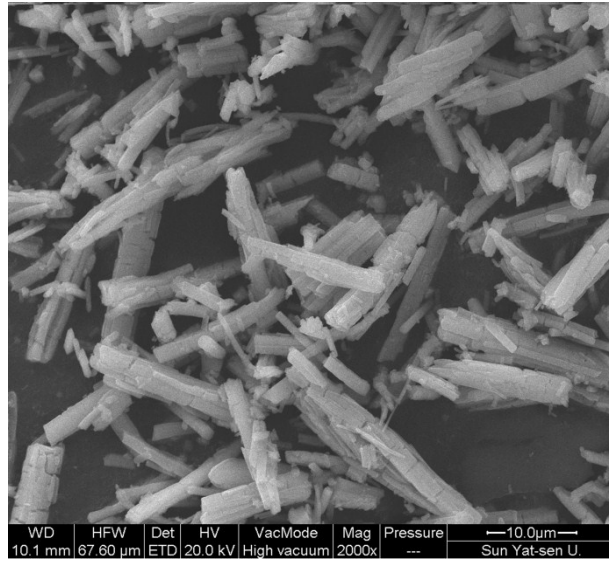

**Fig. S2** FESEM of bare  $\text{TiO}_2$  rods.

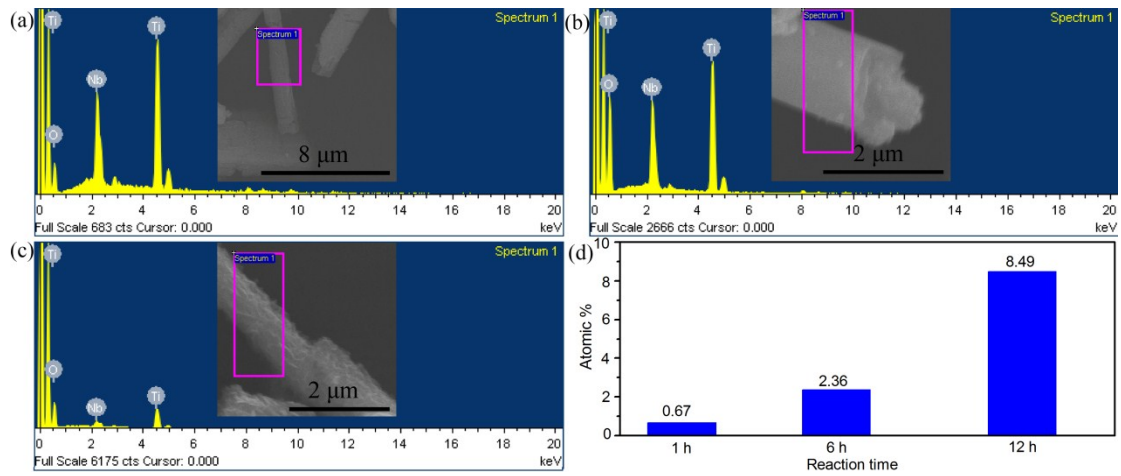

**Fig. S3** The time-dependent EDX spectrum of Nb-doped  $\text{TiO}_2@ \text{Nb}_2\text{O}_5$  heterostructures that obtained by hydrothermal treatment at  $150\text{ }^\circ\text{C}$  for (a) 1 h, (b) 6 h, and (c) 12 h, respectively. (d) Histogram of Nb dopant concentration in above samples with different reaction time.

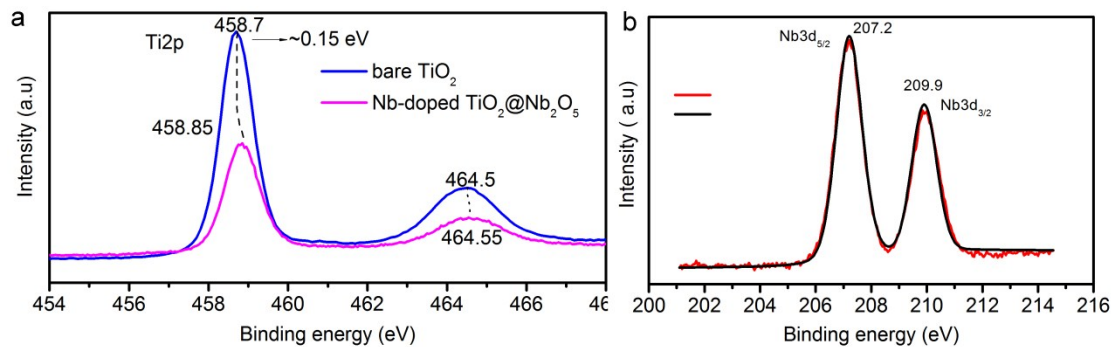

**Fig. S4** (a) High-resolution Ti 2p spectra of bare TiO<sub>2</sub> and Nb-doped TiO<sub>2</sub>@Nb<sub>2</sub>O<sub>5</sub>, showing a ca. 0.15 eV shift to higher binding energy, (b) Nb 3d<sub>5/2</sub> XPS spectra of Nb-doped TiO<sub>2</sub>@Nb<sub>2</sub>O<sub>5</sub> core-shell heterostructures.

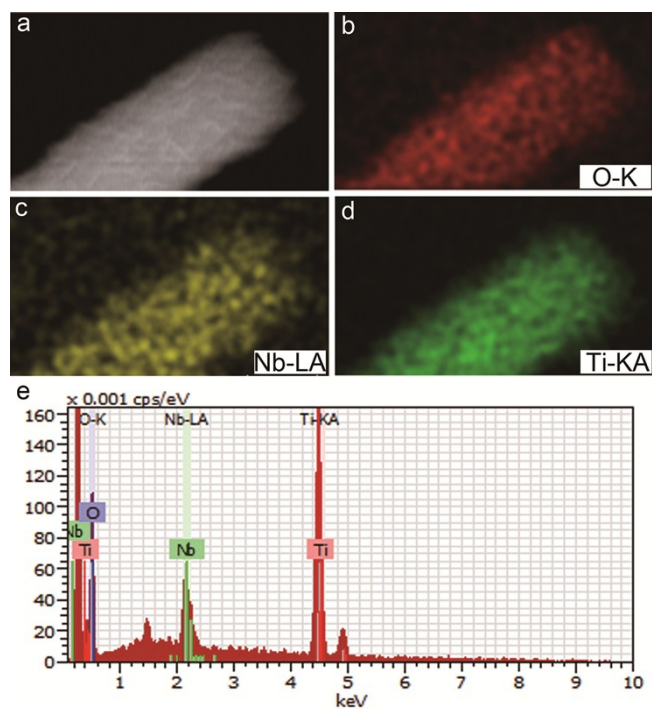

**Fig. S5** Images of elemental mapping and the EDS spectrum of Nb-doped  $\text{TiO}_2@\text{Nb}_2\text{O}_5$  core-shell heterostructures by SEM mapping analysis. All the elements (O, Ti and Nb) are homogeneously distributed in the Nb-doped  $\text{TiO}_2@\text{Nb}_2\text{O}_5$  core-shell heterostructures as shown in the upper images and the EDS spectrum shows the presence of O, Ti and Nb elements.

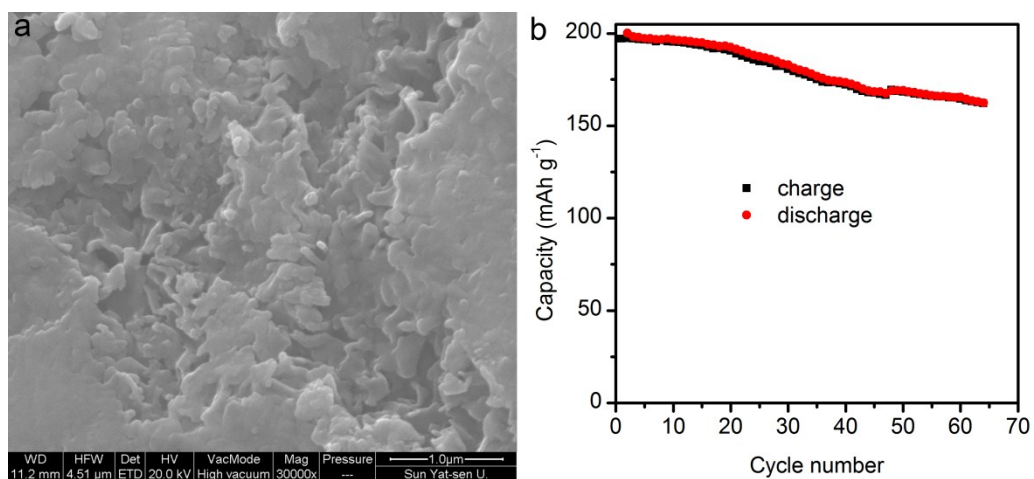

**Fig. S6** (a) The  $\text{Nb}_2\text{O}_5$  nanosheet aggregates produced without the addition of Ti precursor; (b) the cycling performance of bare  $\text{Nb}_2\text{O}_5$  electrodes.

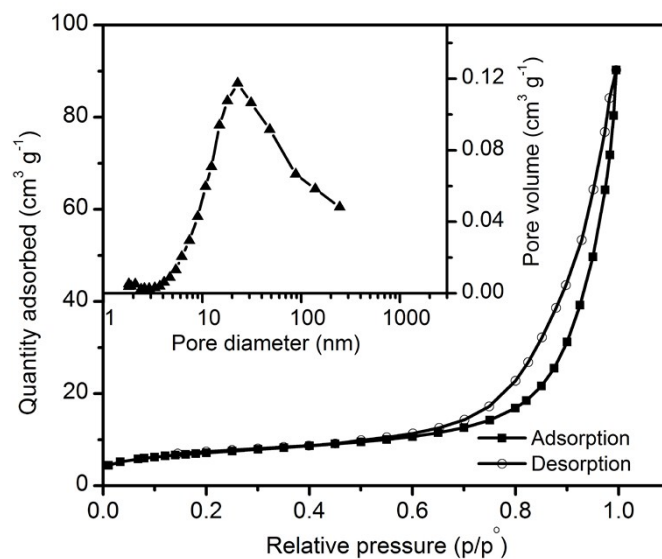

**Fig. S7** Nitrogen adsorption-desorption isotherms for Nb-doped  $\text{TiO}_2@\text{Nb}_2\text{O}_5$  core-shell heterostructures. Inset shows the corresponding pore size distribution.

**Table S1** Resultant values of equivalent circuit for both the Nb-doped  $\text{TiO}_2@\text{Nb}_2\text{O}_5$  and bare  $\text{TiO}_2$  nanorod electrodes after and before cycle.

| samples                                       | $R_c/\Omega$<br>(before) | $R_p/\Omega$<br>(before) | $R_{sf+ct}/\Omega$<br>(before) | $R_e/\Omega$<br>(after) | $R_b/\Omega$<br>(after) | $R_{sf+ct}/\Omega$<br>(after) |
|-----------------------------------------------|--------------------------|--------------------------|--------------------------------|-------------------------|-------------------------|-------------------------------|
| Nb-doped $\text{TiO}_2@\text{Nb}_2\text{O}_5$ | 3.1                      | 14.8                     | 8.2                            | 3                       | 4.4                     | 4.1                           |
| bare $\text{TiO}_2$                           | 3.7                      | 25.1                     | 21.7                           | 3.5                     | 17.7                    | 14.3                          |
